# Supplementary material for: Transposons passively and actively contribute to evolution of the two-speed genome of a fungal pathogen
Source: HighWire-hosted journal article supplement (doi:10.1101/gr.204974.116), 2016-06-20
Supplement: Supplemental_Table_S1.xlsx [file Supplemental_Table_S1.xlsx]

## Sheet: table
Table S1. RepeatMasker results using the RepBase database in combination withde-novoidentification of repeats. Repetitive elements shared byV. dahliaestrains JR2 and VdLS1737are labeled in italics, while repetitive elements that are
found in strain VdLs17 and that lack in strain JR2 are labeled in italics and underlined.
Name	Matcha	Cluster	Length	LTR(bp)	TIR(bp)	TSD(bp)	Order	Superfamily	Expressedb	Located in LS regionsc		BlastN			BlastX			IPRscan (PFAM identifier)
												GenBank ID	Descriptiond	e-value	GenBank ID	Descriptiond	e-value
Class I
VdLINE1	38	28(73.7)	5784				LINE	L1	27	27		HM852750	Verticillium dahliae VdLs.17	0	No hits found			TMF_DNA(PF12329.3);Exo_endo_phos(PF3372.18);RVT(PF00078.22)
VdLTRE1_1	18	3(16.7)	5873	213			LTR	Copia	18	6		HM852745	Verticillium dahliae VdLs.17 retrotransposon Ty1/copia-like LTR element 1	0	AEB91350	gag-pol polyprotein [Verticillium dahliae VdLs.17]	0	AP_ty1;GAG(PF13976.1);RVT;RNaseH
VdLTRE1_2	3		5164	213			LTR	Copia	3	1		HM852745	Verticillium dahliae VdLs.17 retrotransposon Ty1/copia-like LTR element 1	0	No hits found			AP_ty1;GAG(PF13976.1);RVT(07727.9);RNaseH
VdLTRE2_1	31	17(54.8)	6935	476			LTR	Gypsy	16	7		HM852746	Verticillium dahliae VdLs.17 retrotransposon Ty3/Gypsy-like LTR element 2	0	No hits found			GAG(PF13976.1);RVT;RNaseH;INT;CHR
VdLTRE2_2	14	3(21.4)	4923	476			LTR	Gypsy	12	4		HM852746	Verticillium dahliae VdLs.17 retrotransposon Ty3/Gypsy-like LTR element 2	0	No hits found			GAG;RVT;RNaseH;INT;CHR
VdLTRE3	17		6828	433			LTR	Gypsy	13	5		HM852747	Verticillium dahliae VdLs.17 retrotransposon Ty3/Gypsy-like LTR element 3	0	No hits found			GAG;AP;RVT;RNaseH;INT;CHR
VdLTRE4	28	3(10.7)	6870	455			LTR	Gypsy	19	5		HM852748	Verticillium dahliae VdLs.17 retrotransposon Ty3/Gypsy-like LTR element 4	0	No hits found			GAG;AP;RVT;RNaseH;INT;CHR
VdLTRE5			5555	159			LTR	Copia				HM852749	Verticillium dahliae VdLs.17 retrotransposon Ty3/Gypsy-like LTR element 5	0	No hits found			GAG;INT;RVT;RNaseH
VdLTRE6	5		5527	225			LTR	Copia	5	3		JQ625341	Verticillium dahliae strain St14.01 avirulence on Ve1 (Ave1) gene	3e-78	No hits found			AP_Ty1;GAG(PF13976.1);RVT(PF07727.9);RNaseH
VdLTRE7	6		5916	230			LTR	Copia	4	4		AB095266	Verticillium dahliae DNA, sequence specific to strains pathogenic on tomato, including race1 specific sequence, clone: TomR1	0	No hits found			AP_ty1;GAG(PF13976.1);RVT;RNaseH
VdLTRE8	173	119(68.8)	6494	319			LTR		4	11		No hits found			NP_001046453	Os02g0253000 [Oryza sativa Japonica Group]	1e-24	RNaseH
VdLTRE9	224	221(98.7)	7570	197			LTR		3			No hits found			XP_002486765	gag/polymerase/env polyprotein, putative [Talaromyces stipitatus ATCC 10500]	1e-09	RVT
VdLTRE10	117	79(67.5)	7523	288			LTR		2	1		XM_003009489	Verticillium albo-atrum VaMs.102 hypothetical protein	0	ELQ70428	hypothetical protein OOW_P131scaffold00032g4 [Magnaporthe oryzae P131]	3e-51	No hits found
VdLTRE11	9		3840	395			LTR		8	8		No hits found			WP_013371536	hypothetical protein [Paenibacillus polymyxa]_x0001_	2.7	No hits found
VdLTRE12	50	16(32.0)	6828	67			LTR	Gypsy		3		AB095264	Verticillium dahliae DNA, retrotransposon-like sequence, clone: VDf90	0	AEB91353	gag protein [Verticillium dahliae VdLs.17]	1e-102	GAG;RT;RNaseH;INT
Class II
Tc/Mariner_DAHLIAE1a	23		1861		45	2	TIR	Tc1-Mariner	23	3		JN160806	Verticillium dahliae VdLs.17	0	AER39691	transposase [Verticillium dahliae]	0	HTH(PF05225.11);DDE_1(PF03184.14)
Tc/Mariner_DAHLIAE1b	16		1862		41	2	TIR	Tc1-Mariner	16	4		JN160807	Verticillium dahliae transposon Tc/Mariner DAHLIAE1b	0	AER39692	transposase [Verticillium dahliae]	0	HTH(PF05225.11);DDE_1(PF03184.14)
Tc/Mariner_DAHLIAE1c	4		1862		55	2	TIR	Tc1-Mariner	2	3		JN160816	Verticillium dahliae transposon Tc/Mariner DAHLIAE1c	0	No hits found			HTH(PF05225.11);DDE_1(PF03184.14)
Tc/Mariner_DAHLIAE1d	3		1862		53	2	TIR	Tc1-Mariner	3	3		JN160808	Verticillium dahliae transposon Tc/Mariner DAHLIAE1d	0	No hits found			HTH(PF05225.11);DDE_1(PF03184.14)
Tc/Mariner_DAHLIAE1e			1861		62	2	TIR	Tc1-Mariner				JN160817	Verticillium dahliae transposon Tc/Mariner DAHLIAE1e	0	No hits found			HTH(PF05225.11);DDE_1(PF03184.14)
Tc/Mariner_DAHLIAE2	2		1909		62	2	TIR	Tc1-Mariner	2	2		JN160809	Verticillium dahliae transposon Tc/Mariner DAHLIAE2	0	No hits found			HTH(PF05225.11);DDE_1(PF03184.14)
Tc/Mariner_DAHLIAE3			1949		102	2	TIR	Tc1-Mariner				JN160810	Verticillium dahliae transposon Tc/Mariner DAHLIAE3	0	No hits found			HTH(PF05225.11);DDE_1(PF03184.14)
VdHAT1	1		3164				TIR	Activator	1	1		JN160811	Verticillium dahliae transposon activator-like VdHAT1	0	No hits found			hAT(PF05699.9)
VdHAT3			2809				TIR	Activator				JN160812	Verticillium dahliae transposon activator-like VdHAT3	0	No hits found			No hits found
VdHAT4			2101				TIR	Activator				JN160819	Verticillium dahliae transposon activator-like VdHAT4	0	No hits found			hAT(PF05699.9)
VdHAT5			276				TIR	Activator				JN160820	Verticillium dahliae transposon activator-like VdHAT5	3e-140	No hits found			hAT(PF05699.9)
VdHAT6			225				TIR	Activator				JN160821	Verticillium dahliae transposon activator-like VdHAT6	6e-112	No hits found			hAT(PF05699.9)
VdHAT7			240				TIR	Activator				JN160822	Verticillium dahliae transposon activator-like VdHAT7	3e-120	No hits found			hAT(PF05699.9)
VdMULE1	5		3613		86	8	TIR	Mutator	1	4		JN160813	Verticillium dahliae transposon mutator-like VdMULE1	0	No hits found			FAR1(PF03101.10);MULE(PF10551.4)
VdMULE2			3538		81		TIR	Mutator				JN160814	Verticillium dahliae transposon mutator-like VdMULE2	0	No hits found			FAR1(PF03101.10);MULE(PF10551.4)
VdMULE3	1		3406		73		TIR	Mutator	1	1		JN160815	Verticillium dahliae transposon mutator-like VdMULE3	0	No hits found			FAR1(PF03101.10);MULE(PF10551.4)
VdRT2			268									No hits found			No hits found			Vps16(PF04841.8)
VdRT5			245									No hits found			No hits found			No hits found
RepBase																		No hits found
hAT-1_Cglob	1						TIR	Activator	1									No hits found
hAT-7N2_PM	3						TIR	Activator	1									No hits found
BEL1-I_SM	2								1									No hits found
Copia-1_CMe-I	1						LTR	Copia	1									No hits found
Dada-U1A_DR	9																	No hits found
Gypsy-1_CMe-I	1						LTR	Gypsy	1									No hits found
I-5_AO	6								6	5								No hits found
LSU-rRNA_Sce	7							rRNA-LSU										No hits found
MuDR-1_FO	1						TIR	Mutator										No hits found
RT1	1																	No hits found
Tad1-3_BG	1																	No hits found
Tad1-4_BG	1								1	1								No hits found
Tad1-9B_BG	1																	No hits found
Unknown Elemnts
VdUNK1	19	9(47.4)	5845						19	9		XM_003000438	Verticillium albo-atrum VaMs.102 conserved hypothetical protein	0	XP_003000484	conserved hypothetical protein [Verticillium alfalfae VaMs.102]	0	DUF3723(PF12520.3)
VdUNK10	17	7(41.2)	6369						1			No hits found			CCE34685	uncharacterized protein CPUR_08621 [Claviceps purpurea 20.1]	5e-23	INT
VdUNK100			216									No hits found			No hits found			No hits found
VdUNK101	5		788						1			No hits found			No hits found			No hits found
VdUNK102	9		2630									No hits found			No hits found			No hits found
VdUNK103			210									No hits found			No hits found			No hits found
VdUNK104	9		1533						5	6		XM_002999589	Verticillium albo-atrum VaMs.102 predicted protein	0	XP_002999635	predicted protein [Verticillium alfalfae VaMs.102]	6e-154	zf-C2H2(PF13894.1)
VdUNK105	5		825							1		XM_002999575	Verticillium albo-atrum VaMs.102 predicted protein	5e-158	EGY23768	hypothetical protein VDAG_05206 [Verticillium dahliae VdLs.17]	8e-73	Zn_clus(PF00172.13)
VdUNK11	4		1220				TIR	Tc1-Mariner	4	4		XM_002999612	Verticillium albo-atrum VaMs.102 conserved hypothetical protein	2e-143	CDM32541	Probable transposable element [Penicillium roqueforti]	7e-69	HTH(PF13592.1);DDE_1(PF13358.1)
VdUNK12	71	57(80.3)	4986						9			AB095265	Verticillium dahliae DNA retrotransposon-like sequence clone: VDf35	0	EGY13606	hypothetical protein VDAG_00288 [Verticillium dahliae VdLs.17]	9e-30	No hits found
VdUNK13	4		1416						3	2		No hits found			No hits found			Big_1(PF02369.11)
VdUNK14			385									No hits found			No hits found			No hits found
VdUNK15	7		5679						5	3		XM_003000443	Verticillium albo-atrum VaMs.102 hypothetical protein	0	No hits found			No hits found
VdUNK16	7		1022						3	4		XM_002999590	Verticillium albo-atrum VaMs.102 predicted protein	3e-158	No hits found			No hits found
VdUNK17			265									XM_003009489	Verticillium albo-atrum VaMs.102 hypothetical protein	7e-25	No hits found			No hits found
VdUNK18	7		3338						6	2		XM_002999572	Verticillium albo-atrum VaMs.102 conserved hypothetical protein	0	No hits found			DUF3435(PF11917.3)
VdUNK19	59	55(93.2)	9142						1			AB095265	Verticillium dahliae DNA retrotransposon-like sequence clone: VDf35	0	XP_001225721	hypothetical protein CHGG_08065 [Chaetomium globosum CBS 148.51]_x0001_	1e-11	No hits found
VdUNK2	1		526									No hits found			No hits found			No hits found
VdUNK20	4		417							2		No hits found			EDN66463	hypothetical protein BGP_4966 [Beggiatoa sp. PS]	3.8	No hits found
VdUNK21			380									XM_002999583	Verticillium albo-atrum VaMs.102 predicted protein	3e-179	EGY23800	hypothetical protein VDAG_05238 [Verticillium dahliae VdLs.17]	2e-56	No hits found
VdUNK22	6		425						1			No hits found			No hits found			No hits found
VdUNK23			274									No hits found			EGY23438	hypothetical protein VDAG_04876 [Verticillium dahliae VdLs.17]	9e-50	DUF1996(PF09362.5)
VdUNK24	1		561						1			No hits found			XP_003048916	hypothetical protein NECHADRAFT_105024 [Nectria haematococca mpVI 77-13-4]_x0001_	9e-07	No hits found
VdUNK25	13	12(92.3)	7476					rRNA-SSU	6			AF104926	Verticillium dahliae 18S ribosomal RNA gene ITS1	0	XP_003614388	hypothetical protein MTR_5g051050, partial [Medicago truncatula]	2e-93	No hits found
VdUNK26			254									AY578178	Verticillium dahliae clone VdRT8 Ty1-copia retrotransposon-like putative reverse transcriptase gene	3e-124	XP_005147990	plasma membrane calcium-transporting ATPase 1 isoform X6 [Melopsittacus undulatus]	5.7	No hits found
VdUNK27	2		717				TIR	Tc1-Mariner	2	2		No hits found			EGY18692	hypothetical protein VDAG_09218 [Verticillium dahliae VdLs.17]	2e-42	DDE_3(PF13358.1)
VdUNK28			726									No hits found			AER39693	transposase [Verticillium dahliae]	2e-43	No hits found
VdUNK29			504				TIR	Tc1-Mariner				No hits found			No hits found			DDE_1(PF03184.14)
VdUNK3	49	44(89.8)	8820						1			No hits found			XP_001225721	hypothetical protein CHGG_08065 [Chaetomium globosum CBS 148.51]_x0001_	1e-16	No hits found
VdUNK30	1		996				TIR	Tc1-Mariner	1			No hits found			No hits found			HTH(PF01498);DDE3(PF13358.1)
VdUNK31	9		2503							9		XM_002999612	Verticillium albo-atrum VaMs.102 conserved hypothetical protein	0	No hits found			DDE_3(PF13358.1)
VdUNK32	1		1026						1			No hits found			No hits found			No hits found
VdUNK33	1		774						1			XM_003003255	Verticillium albo-atrum VaMs.102 MYB and HSA domain-containing protein	0	No hits found			No hits found
VdUNK34	5		487						5	2		No hits found			No hits found			Herpes(PF02480.11)
VdUNK35			227									No hits found			No hits found			No hits found
VdUNK36	4		555							2		XM_003000445	Verticillium albo-atrum VaMs.102 predicted protein	0	No hits found			YscO(PF07321.7)
VdUNK37	5		627						1	3		XM_002999583	Verticillium albo-atrum VaMs.102 predicted protein	0	No hits found			No hits found
VdUNK38	4		8444						4	2		No hits found			No hits found			No hits found
VdUNK39	6		751						4	5		No hits found			No hits found			DFU1996(PF09362.5)
VdUNK4	7		5950						5	5		No hits found			No hits found			No hits found
VdUNK40	5		570						3	4		No hits found			No hits found			No hits found
VdUNK41	5		854						5	2		No hits found			No hits found			No hits found
VdUNK42			298									No hits found			XP_004529445	PREDICTED: protein arginine N-methyltransferase 8-like [Ceratitis capitata]	2.2	No hits found
VdUNK43	5		451						3	2		No hits found			XP_003448059	PREDICTED: diacylglycerol kinase epsilon [Oreochromis niloticus]	5	No hits found
VdUNK44	5		476							3		XM_002999585	Verticillium albo-atrum VaMs.102 predicted protein	3e-148	XP_002999631	predicted protein [Verticillium alfalfae VaMs.102]_x0001_	4e-62	No hits found
VdUNK45	11		653						6			No hits found			No hits found			No hits found
VdUNK46			249									No hits found			WP_018063489	hypothetical protein [Martelella mediterranea]	3.4	No hits found
VdUNK47	16		3146						3			No hits found			No hits found			No hits found
VdUNK48	4		585							3		No hits found			No hits found			No hits found
VdUNK49	6		638						5	3		XM_003000456	Verticillium albo-atrum VaMs.102 hypothetical protein	0	XP_002999635	predicted protein [Verticillium alfalfae VaMs.102]_x0001_	3e-61	No hits found
VdUNK5	6		1177						6	4		EU554376	Colletotrichum cereale clone B8 microsatellite sequence	5e-25	No hits found			No hits found
VdUNK50			308									No hits found			XP_003144813	hypothetical protein LOAG_09237 [Loa loa]	4.9	No hits found
VdUNK51			279									No hits found			WP_008913645	hypothetical protein [Providencia burhodogranariea]_x0001_	0.46	No hits found
VdUNK52			251									No hits found			EGY18604	hypothetical protein VDAG_09130 [Verticillium dahliae VdLs.17]	9e-46	No hits found
VdUNK53	9		475									No hits found			No hits found			No hits found
VdUNK54			227									No hits found			EXK83408	hypothetical protein FOQG_12270 [Fusarium oxysporum f. sp. raphani 54005]	1e-22	ATP-gua_PtransN(PF02807.10)
VdUNK55			368									No hits found			No hits found			No hits found
VdUNK56	9		663						7	7		XM_003044242	Nectria haematococca mpVI 77-13-4 hypothetical protein	2e-154	EXK77771	hypothetical protein FOQG_17540 [Fusarium oxysporum f. sp. raphani 54005]	7e-138	No hits found
VdUNK57	4		561						1	3		No hits found			No hits found			No hits found
VdUNK58			322									No hits found			No hits found			No hits found
VdUNK59			332									No hits found			WP_014959231	DNA repair protein RecN [Desulfobacula toluolica]_x0001_r	9.9	No hits found
VdUNK6	15		1853						4			No hits found			No hits found			No hits found
VdUNK60	4		498						3	2		AB095266	Verticillium dahliae DNA sequence specific to strains pathogenic on tomato including race1 specific sequence clone: TomR1	0	XP_002999627	nodulation protein L [Verticillium alfalfae VaMs.102]	4e-44	No hits found
VdUNK61			338									No hits found			XP_001763598	predicted protein [Physcomitrella patens]_x0001_	1	No hits found
VdUNK62			256									No hits found			No hits found			No hits found
VdUNK63			299									No hits found			WP_018063489	hypothetical protein [Martelella mediterranea]	4.4	No hits found
VdUNK64	4		1664							3		XM_003000693	Verticillium albo-atrum VaMs.102 predicted protein	8e-119	XP_003000739	predicted protein [Verticillium alfalfae VaMs.102]_x0001_	6e-60	No hits found
VdUNK65	4		1309						4	3		No hits found			EGY18660	hypothetical protein VDAG_09186 [Verticillium dahliae VdLs.17]	2e-170	DUF3435(PF11917.3)
VdUNK66			236									No hits found			No hits found			No hits found
VdUNK67			365									No hits found			No hits found			No hits found
VdUNK68			261									No hits found			WP_026918853	hypothetical protein [Gordonia shandongensis]	6.3	No hits found
VdUNK69			208									AB095266	Verticillium dahliae DNA sequence specific to strains pathogenic on tomato including race1 specific sequence clone: TomR1	3e-83	XP_002999627	nodulation protein L [Verticillium alfalfae VaMs.102]_x0001_	2e-31	No hits found
VdUNK7	5		456						2	1		No hits found			No hits found			No hits found
VdUNK70	4		406						3			No hits found			KDN61748	hypothetical protein CSUB01_12427 [Colletotrichum sublineola]	9e-19	No hits found
VdUNK71	10		690						2	8		No hits found			WP_011138032	purine nucleoside phosphorylase [Wolinella succinogenes]_x0001_r	8.1	No hits found
VdUNK72	4		554							4		No hits found			No hits found			No hits found
VdUNK73	3		575						3	3		No hits found			EGY18674	hypothetical protein VDAG_09200 [Verticillium dahliae VdLs.17]	1e-90	Glyco_hydro(PF11790.3)
VdUNK74			251									No hits found			No hits found			No hits found
VdUNK75	3		867						3	3		No hits found			EGY18678	hypothetical protein VDAG_09204 [Verticillium dahliae VdLs.17]	4e-77	No hits found
VdUNK76			371									No hits found			EGY18674	hypothetical protein VDAG_09200 [Verticillium dahliae VdLs.17]	1e-80	Glyco_hydro(PF11790.3)
VdUNK77	1		376						1			No hits found			No hits found			No hits found
VdUNK78			215									No hits found			XP_006007198	PREDICTED: pro-neuregulin-3, membrane-bound isoform-like [Latimeria chalumnae]	2.8	No hits found
VdUNK79			278									No hits found			WP_028162925	cation transporter [Bradyrhizobium elkanii]	8.6	No hits found
VdUNK8	9		479						6	9		No hits found			No hits found			No hits found
VdUNK80	3		864						3	3		No hits found			EGY18678	hypothetical protein VDAG_09204 [Verticillium dahliae VdLs.17]	5e-89	APH(PF01636.18)
VdUNK81			350									No hits found			No hits found			No hits found
VdUNK82			269									No hits found			EGY23439	hypothetical protein VDAG_04877 [Verticillium dahliae VdLs.17]	5e-56	No hits found
VdUNK83			242									No hits found			No hits found			No hits found
VdUNK84			688									XM_003000436	Verticillium albo-atrum VaMs.102 predicted protein	0	XP_003000482	predicted protein [Verticillium alfalfae VaMs.102]_x0001_	5e-90	No hits found
VdUNK85	11	4(36.4)	1709						11	6		XM_003000436	Verticillium albo-atrum VaMs.102 predicted protein	0	XP_003000482	predicted protein [Verticillium alfalfae VaMs.102]_x0001_	2e-56	No hits found
VdUNK86			238									No hits found			XP_006962602	predicted protein [Trichoderma reesei QM6a]_x0001_	0.13	No hits found
VdUNK87			259									No hits found			No hits found			No hits found
VdUNK88			203									XM_003006578	Verticillium albo-atrum VaMs.102 protein kinase domain-containing protein	1e-19	EGY20163	hypothetical protein VDAG_02179 [Verticillium dahliae VdLs.17]	9e-07	No hits found
VdUNK89	10		1630						4	5		XM_003000462	Verticillium albo-atrum VaMs.102 predicted protein	7e-161	EGY23821	hypothetical protein VDAG_05259 [Verticillium dahliae VdLs.17]	6e-48	No hits found
VdUNK9	18	13(72.2)	5251						9	9		AB095266	Verticillium dahliae DNA sequence specific to strains pathogenic on tomato including race1 specific sequence clone: TomR1	0	No hits found			BRCT(PF00533.21)
VdUNK90	28	18(64.3)	2446						1			No hits found			EGY19019	hypothetical protein VDAG_09353 [Verticillium dahliae VdLs.17]	0.13	No hits found
VdUNK91	8		1503						3	6		No hits found			EGY23692	hypothetical protein VDAG_05130 [Verticillium dahliae VdLs.17]	4e-123	No hits found
VdUNK92	8		2444						4	2		XM_003000469	Verticillium albo-atrum VaMs.102 hypothetical protein	0	No hits found			SRF-TF(PF00319.13)
VdUNK93	5		2164						5	5		XM_002999611	Verticillium albo-atrum VaMs.102 predicted protein	2e-22	No hits found			No hits found
VdUNK94	5		1952						5	2		XM_002999591	Verticillium albo-atrum VaMs.102 hypothetical protein	0	No hits found			No hits found
VdUNK95	7		2165						6	6		XM_002999651	Verticillium albo-atrum VaMs.102 predicted protein	0	No hits found			No hits found
VdUNK96	6		1115						3	2		XM_003000440	Verticillium albo-atrum VaMs.102 predicted protein	2e-161	No hits found			No hits found
VdUNK97			262									No hits found			No hits found			No hits found
VdUNK98			275									No hits found			No hits found			No hits found
VdUNK99			248									AY874359	Verticillium dahliae mitogen-activated protein kinase (vmk1) gene	5e-63	No hits found			No hits found
anumber of times that the transposable element, or part of it (> 400 bp), is identified in the genome
bnumber of regions in the genome matching a transposable element and covered by reads derived from RNA-seq data (log10(RPKM+1)> 0)25
cnumber of times that a transposable element matches a genomic region within lineage-specific regions
donly the best hit in the Nr database is reported for each query
