# Supplementary material for: Transposons passively and actively contribute to evolution of the two-speed genome of a fungal pathogen
Source: HighWire-hosted journal article supplement (doi:10.1101/gr.204974.116), 2016-06-20
Supplement: Supplemental_Table_S2.xlsx [file Supplemental_Table_S2.xlsx]

## Sheet: VDAG_JR2ref_VdLs17querMaskedGen
Table S2. Location of lineage specific regions
in the genome of V. dahliae strain JR2 when compared with strain VdLs17
Chromosome	Start	End	Cluster*
Chr2	1395173	1395763
Chr2	2885172	2890813	LS1
Chr2	2894889	2896579	LS1
Chr2	2932038	2932902	LS1
Chr2	2933137	2936920	LS1
Chr2	2941566	2942249	LS1
Chr2	2943125	2945755	LS1
Chr2	2950009	2958634	LS1
Chr2	2959669	2964183	LS1
Chr2	2965549	2967599	LS1
Chr2	2973989	2975368	LS1
Chr2	2985960	2986550	LS1
Chr2	3026946	3028152	LS1
Chr2	3198047	3202286	LS1
Chr2	3208790	3211498	LS1
Chr2	3250423	3251109	LS1
Chr2	3256141	3260253	LS1
Chr2	3260748	3295700	LS1
Chr2	3296803	3302695	LS1
Chr2	3306998	3307588	LS1
Chr2	3345683	3346273	LS1
Chr2	3346501	3353905	LS1
Chr2	3359602	3362085	LS1
Chr2	3362311	3364325	LS1
Chr2	3365692	3370206	LS1
Chr2	3373457	3374124	LS1
Chr2	3385277	3390026	LS1
Chr2	3393242	3393927	LS1
Chr2	3426932	3429640	LS1
Chr2	3432705	3437763	LS1
Chr2	3451335	3452357	LS1
Chr2	3452772	3453322	LS1
Chr2	3455394	3456314	LS1
Chr2	3456712	3459053	LS1
Chr2	3466924	3467508	LS1
Chr2	3467969	3473797	LS1
Chr2	3473868	3474896	LS1
Chr2	3481249	3487387	LS1
Chr2	3488488	3489575	LS1
Chr2	3489939	3493201	LS1
Chr2	3495568	3497044	LS1
Chr2	3506275	3510924	LS1
Chr2	3511147	3512997	LS1
Chr2	3513586	3516913	LS1
Chr2	3520073	3522529	LS1
Chr2	3523387	3524666	LS1
Chr2	3546779	3547296	LS1
Chr2	3547894	3548672	LS1
Chr2	3550715	3551797	LS1
Chr2	3552114	3555492	LS1
Chr2	3561077	3561961	LS1
Chr2	3579670	3582459	LS1
Chr2	3584018	3585728	LS1
Chr2	3587067	3589488	LS1
Chr2	3597787	3606150	LS1
Chr2	3612674	3613387	LS1
Chr2	3613825	3617393	LS1
Chr4	1042910	1051757	LS2
Chr4	1052492	1055976	LS2
Chr4	1056476	1057203	LS2
Chr4	1058344	1059354	LS2
Chr4	1059689	1079622	LS2
Chr4	1080590	1089174	LS2
Chr4	1089967	1107061	LS2
Chr4	1120148	1121474	LS2
Chr4	1131105	1134716	LS2
Chr4	1138773	1163655	LS2
Chr4	1165289	1169431	LS2
Chr4	1169764	1171368	LS2
Chr4	1171694	1172644	LS2
Chr4	1175098	1178707	LS2
Chr4	1179040	1179965	LS2
Chr4	1196799	1197991	LS2
Chr4	1297304	1298299	LS2
Chr4	1299057	1300185	LS2
Chr4	1407068	1411304	LS2
Chr4	1411534	1414998	LS2
Chr4	1471222	1471964	LS2
Chr4	3350173	3352688
Chr4	3355051	3356464
Chr4	4082668	4084432
Chr4	4086845	4086908
Chr5	624573	626145	LS3
Chr5	668454	672064	LS3
Chr5	679317	695340	LS3
Chr5	695567	701437	LS3
Chr5	707354	708577	LS3
Chr5	709524	711890	LS3
Chr5	713783	719784	LS3
Chr5	768477	772713	LS3
Chr5	784241	788266	LS3
Chr5	807768	843165	LS3
Chr5	843490	902771	LS3
Chr5	903730	910749	LS3
Chr5	915686	921339	LS3
Chr5	922252	925402	LS3
Chr5	925973	931767	LS3
Chr5	931999	933445	LS3
Chr5	938926	947903	LS3
Chr5	959899	964697	LS3
Chr5	1000404	1007155	LS3
Chr5	1012197	1019550	LS3
Chr5	1019733	1020267	LS3
Chr5	1021406	1022557	LS3
Chr5	1022851	1025298	LS3
Chr5	1025794	1026741	LS3
Chr5	1027759	1028284	LS3
Chr5	1055004	1055746
Chr5	3496864	3497892	LS4
Chr5	3505253	3506682	LS4
Chr5	3507175	3508363	LS4
Chr5	3512516	3513244	LS4
Chr5	3514191	3515203	LS4
Chr5	3515907	3517061	LS4
Chr5	3517516	3518689	LS4
Chr5	3521037	3521906	LS4
Chr5	3524412	3525540	LS4
Chr5	3525922	3527385	LS4
Chr5	3643243	3644080	LS4
Chr5	3659845	3665792	LS4
Chr5	3666304	3672625	LS4
Chr5	3686197	3687892	LS4
Chr5	3706790	3708472	LS4
Chr5	4168857	4171343
Chr6	3184857	3185447
Chr8	2908999	2909732
* clusters refer to Figure 2
