# Supplementary material for: Transposons passively and actively contribute to evolution of the two-speed genome of a fungal pathogen
Source: HighWire-hosted journal article supplement (doi:10.1101/gr.204974.116), 2016-06-20
Supplement: Supplemental_Table_S3.xlsx [file Supplemental_Table_S3.xlsx]

## Sheet: Jr2onVDAG_Jr2_v4.0.NCBIorder.fa
Table S3. Genomic duplication with in the V. dahlaie strain JR2 genome
Chromosome	Begin	End	Matching length	Chromosome	Begin	End	Matching length	Identity	Oriantation
Chr1	1767762	1772042	4281	Chr1	1767762	1772080	4319	99.12	1
Chr1	1767762	1772080	4319	Chr1	1767762	1772042	4281	99.12	1
Chr1	2030215	2031317	1103	Chr2	3295700	3296803	1104	94.29	1
Chr1	6180995	6182134	1140	Chr4	1057203	1058344	1142	95.89	1
Chr2	2740117	2742007	1891	Chr5	711890	713783	1894	85.81	1
Chr2	2876680	2877802	1123	Chr2	3002596	3003719	1124	97.69	-1
Chr2	2879115	2881739	2625	Chr2	2998656	3001283	2628	97.75	-1
Chr2	2882090	2885172	3083	Chr2	2995316	2998389	3074	91.24	-1
Chr2	2885869	2887121	1253	Chr4	1142089	1143329	1241	93.17	-1
Chr2	2888786	2890723	1938	Chr2	3433280	3435218	1939	99.43	-1
Chr2	2889598	2890723	1126	Chr4	1139300	1140423	1124	94.59	-1
Chr2	2905310	2910444	5135	Chr2	3224827	3229961	5135	100	1
Chr2	2905310	2910443	5134	Chr2	3414120	3419249	5130	99.14	-1
Chr2	2905310	2910090	4781	Chr5	3672628	3677432	4805	97.71	-1
Chr2	2911718	2914277	2560	Chr2	3231235	3233795	2561	99.1	1
Chr2	2911718	2916043	4326	Chr2	3408733	3413056	4324	97.97	-1
Chr2	2914279	2916040	1762	Chr2	3233939	3235745	1807	89.02	1
Chr2	2916598	2919124	2527	Chr2	3236304	3238832	2529	98.85	1
Chr2	2916598	2919124	2527	Chr2	3405616	3408146	2531	95.95	-1
Chr2	2923642	2930185	6544	Chr2	3243373	3249945	6573	96.63	1
Chr2	2923643	2930185	6543	Chr2	3394405	3400960	6556	97.97	-1
Chr2	2933005	2935653	2649	Chr2	3387551	3390158	2608	92.73	-1
Chr2	2935653	2936903	1251	Chr2	3385272	3386522	1251	95.37	-1
Chr2	2937839	2938946	1108	Chr2	3382499	3383629	1131	94.08	-1
Chr2	2938976	2940329	1354	Chr2	3375358	3376712	1355	95.16	-1
Chr2	2940999	2942373	1375	Chr2	3373333	3374691	1359	91.9	-1
Chr2	2959490	2964197	4708	Chr2	3365678	3370383	4706	99.02	-1
Chr2	2964449	2967045	2597	Chr2	3362809	3365426	2618	94.69	-1
Chr2	2970484	2974604	4121	Chr4	1197420	1201508	4089	94.22	-1
Chr2	2972481	2974095	1615	Chr5	933334	934940	1607	91.13	-1
Chr2	2995316	2998389	3074	Chr2	2882090	2885172	3083	91.24	-1
Chr2	2998656	3001283	2628	Chr2	2879115	2881739	2625	97.75	-1
Chr2	3002596	3003719	1124	Chr2	2876680	2877802	1123	97.69	-1
Chr2	3147945	3149926	1982	Chr2	3577690	3579670	1981	95.41	-1
Chr2	3150178	3154962	4785	Chr2	3572642	3577438	4797	95.41	-1
Chr2	3155746	3159644	3899	Chr2	3567836	3571739	3904	96.54	-1
Chr2	3163792	3165452	1661	Chr2	3314528	3316191	1664	84.65	1
Chr2	3172338	3174783	2446	Chr2	3476942	3479386	2445	99.51	1
Chr2	3177641	3178705	1065	Chr2	3317261	3318327	1067	83.95	-1
Chr2	3177715	3178954	1240	Chr2	3545561	3546779	1219	93.72	-1
Chr2	3181032	3182932	1901	Chr2	3541399	3543299	1901	97.95	-1
Chr2	3191656	3192938	1283	Chr2	3548672	3549954	1283	98.52	1
Chr2	3202286	3205155	2870	Chr5	3692528	3695399	2872	99.83	-1
Chr2	3205339	3206414	1076	Chr5	3691269	3692344	1076	99.63	-1
Chr2	3224827	3229961	5135	Chr2	2905310	2910444	5135	100	1
Chr2	3224827	3229960	5134	Chr2	3414120	3419249	5130	99.14	-1
Chr2	3224827	3229607	4781	Chr5	3672628	3677432	4805	97.71	-1
Chr2	3231235	3233795	2561	Chr2	2911718	2914277	2560	99.1	1
Chr2	3231235	3233795	2561	Chr2	3410497	3413056	2560	97.46	-1
Chr2	3233939	3235745	1807	Chr2	2914279	2916040	1762	89.02	1
Chr2	3233939	3235745	1807	Chr2	3408736	3410495	1760	88.94	-1
Chr2	3236304	3238832	2529	Chr2	2916598	2919124	2527	98.85	1
Chr2	3236304	3238832	2529	Chr2	3405616	3408146	2531	95.01	-1
Chr2	3243373	3249945	6573	Chr2	2923642	2930185	6544	96.63	1
Chr2	3243374	3249947	6574	Chr2	3394403	3400960	6558	97.28	-1
Chr2	3250778	3252477	1700	Chr2	3391875	3393573	1699	98.71	-1
Chr2	3251109	3252149	1041	Chr4	1026765	1027789	1025	84.92	-1
Chr2	3295700	3296803	1104	Chr1	2030215	2031317	1103	94.29	1
Chr2	3304346	3305527	1182	Chr3	2649456	2650655	1200	87.17	-1
Chr2	3314528	3316191	1664	Chr2	3163792	3165452	1661	84.65	1
Chr2	3317261	3318327	1067	Chr2	3177641	3178705	1065	83.95	-1
Chr2	3326660	3335983	9324	Chr5	3555289	3564620	9332	89.53	1
Chr2	3336647	3340629	3983	Chr5	3565284	3569308	4025	98.68	1
Chr2	3357052	3359602	2551	Chr4	1204368	1206925	2558	97.46	1
Chr2	3362809	3365426	2618	Chr2	2964449	2967045	2597	94.69	-1
Chr2	3365678	3370383	4706	Chr2	2959490	2964197	4708	99.02	-1
Chr2	3373333	3374691	1359	Chr2	2940999	2942373	1375	91.9	-1
Chr2	3375358	3376712	1355	Chr2	2938976	2940329	1354	95.16	-1
Chr2	3382499	3383629	1131	Chr2	2937839	2938946	1108	94.08	-1
Chr2	3385272	3386522	1251	Chr2	2935653	2936903	1251	95.37	-1
Chr2	3387551	3390158	2608	Chr2	2933005	2935653	2649	92.73	-1
Chr2	3391875	3393573	1699	Chr2	3250778	3252477	1700	98.71	-1
Chr2	3392203	3393242	1040	Chr4	1026765	1027789	1025	85.38	1
Chr2	3394403	3400960	6558	Chr2	3243374	3249947	6574	97.55	-1
Chr2	3394405	3400960	6556	Chr2	2923643	2930185	6543	97.97	-1
Chr2	3405616	3408146	2531	Chr2	2916598	2919124	2527	95.95	-1
Chr2	3405616	3408146	2531	Chr2	3236304	3238832	2529	95.01	-1
Chr2	3408733	3413056	4324	Chr2	2911718	2916043	4326	97.97	-1
Chr2	3408736	3410495	1760	Chr2	3233939	3235745	1807	88.94	-1
Chr2	3410497	3413056	2560	Chr2	3231235	3233795	2561	97.46	-1
Chr2	3414120	3419249	5130	Chr2	2905310	2910443	5134	99.14	-1
Chr2	3414120	3419249	5130	Chr2	3224827	3229960	5134	99.14	-1
Chr2	3414473	3419249	4777	Chr5	3672628	3677432	4805	97.9	1
Chr2	3432012	3434406	2395	Chr4	1138080	1140423	2344	91.36	1
Chr2	3433280	3435218	1939	Chr2	2888786	2890723	1938	99.43	-1
Chr2	3460100	3461519	1420	Chr7	231127	232535	1409	84.04	1
Chr2	3461898	3463574	1677	Chr7	232535	234209	1675	84.53	1
Chr2	3476942	3479386	2445	Chr2	3172338	3174783	2446	99.51	1
Chr2	3497044	3498055	1012	Chr5	3437193	3438200	1008	97.43	-1
Chr2	3501143	3502767	1625	Chr5	3467987	3469596	1610	97.72	1
Chr2	3502767	3506027	3261	Chr5	3472029	3475337	3309	94.34	1
Chr2	3516913	3519307	2395	Chr5	3475584	3477977	2394	93.66	1
Chr2	3541399	3543299	1901	Chr2	3181032	3182932	1901	97.95	-1
Chr2	3545561	3546779	1219	Chr2	3177715	3178954	1240	93.72	-1
Chr2	3548672	3549954	1283	Chr2	3191656	3192938	1283	98.52	1
Chr2	3567836	3571739	3904	Chr2	3155746	3159644	3899	96.54	-1
Chr2	3572642	3577438	4797	Chr2	3150178	3154962	4785	95.41	-1
Chr2	3577690	3579670	1981	Chr2	3147945	3149926	1982	95.41	-1
Chr2	3589488	3597787	8300	Chr5	3439844	3448120	8277	93.13	1
Chr2	3617565	3620789	3225	Chr5	3423647	3426868	3222	81.77	-1
Chr3	343201	344831	1631	Chr4	1003445	1005074	1630	87.43	-1
Chr3	2014029	2015162	1134	Chr5	1020267	1021406	1140	84.56	-1
Chr3	2649456	2650655	1200	Chr2	3304346	3305527	1182	87.17	-1
Chr4	938109	939241	1133	Chr5	562252	563324	1073	88.2	1
Chr4	946100	947218	1119	Chr4	1369084	1370202	1119	99.73	1
Chr4	946100	947218	1119	Chr5	571753	572870	1118	99.73	1
Chr4	948515	956458	7944	Chr4	1371499	1379445	7947	99.16	1
Chr4	948515	956458	7944	Chr5	574164	582099	7936	99.03	1
Chr4	948524	955898	7375	Chr4	1461487	1468788	7302	89.73	-1
Chr4	948524	955118	6595	Chr5	1035166	1041699	6534	91.36	1
Chr4	949892	955966	6075	Chr4	1109427	1115461	6035	92.45	1
Chr4	949892	956457	6566	Chr5	719823	726345	6523	90.87	1
Chr4	962472	965088	2617	Chr4	1385499	1388114	2616	99.96	1
Chr4	962472	965088	2617	Chr5	588137	590749	2613	99.81	1
Chr4	962473	965088	2616	Chr5	988404	991018	2615	99.81	1
Chr4	962491	965070	2580	Chr4	1183882	1186523	2642	86.97	1
Chr4	962491	965071	2581	Chr4	1449769	1452382	2614	86.2	-1
Chr4	962491	965071	2581	Chr5	734692	737305	2614	86.24	1
Chr4	963674	965087	1414	Chr5	1033565	1035025	1461	87.24	-1
Chr4	974156	975399	1244	Chr5	599924	601167	1244	100	1
Chr4	995438	1000060	4623	Chr4	1415130	1419728	4599	98.36	-1
Chr4	998463	999925	1463	Chr5	958230	959683	1454	85.9	-1
Chr4	1003445	1005074	1630	Chr3	343201	344831	1631	87.43	-1
Chr4	1026765	1027789	1025	Chr2	3251109	3252149	1041	84.92	-1
Chr4	1026765	1027789	1025	Chr2	3392203	3393242	1040	85.38	1
Chr4	1032932	1037252	4321	Chr5	953557	957915	4359	85.99	-1
Chr4	1041362	1043014	1653	Chr4	1041362	1043001	1640	97.88	1
Chr4	1041362	1043001	1640	Chr4	1041362	1043014	1653	97.88	1
Chr4	1041438	1042907	1470	Chr5	947903	949381	1479	94.73	-1
Chr4	1041582	1043024	1443	Chr5	805733	807176	1444	87.08	1
Chr4	1043489	1045279	1791	Chr5	945348	947094	1747	91.23	-1
Chr4	1048727	1050276	1550	Chr4	1062499	1064048	1550	100	-1
Chr4	1057203	1058344	1142	Chr1	6180995	6182134	1140	95.89	1
Chr4	1062499	1064048	1550	Chr4	1048727	1050276	1550	100	-1
Chr4	1109388	1115461	6074	Chr5	719784	725854	6071	97.81	1
Chr4	1109427	1115461	6035	Chr4	949892	955966	6075	92.45	1
Chr4	1109427	1115461	6035	Chr4	1372877	1378953	6077	93.13	1
Chr4	1109427	1115461	6035	Chr5	575540	581607	6068	93.25	1
Chr4	1109428	1115394	5967	Chr4	1461485	1467434	5950	95.76	-1
Chr4	1109428	1114611	5184	Chr5	1036528	1041699	5172	98.23	1
Chr4	1138080	1140423	2344	Chr2	3432012	3434406	2395	91.36	1
Chr4	1139300	1140423	1124	Chr2	2889598	2890723	1126	94.59	-1
Chr4	1142089	1143329	1241	Chr2	2885869	2887121	1253	93.17	-1
Chr4	1183803	1186598	2796	Chr4	1449695	1452461	2767	93.99	-1
Chr4	1183803	1186598	2796	Chr5	734613	737379	2767	93.96	1
Chr4	1183882	1186523	2642	Chr4	962491	965070	2580	86.97	1
Chr4	1183882	1186523	2642	Chr4	1385518	1388096	2579	86.93	1
Chr4	1183882	1186523	2642	Chr5	588156	590731	2576	86.78	1
Chr4	1183882	1186523	2642	Chr5	988422	991000	2579	86.86	1
Chr4	1185067	1186544	1478	Chr5	1033561	1035025	1465	91.02	-1
Chr4	1197420	1201508	4089	Chr2	2970484	2974604	4121	94.22	-1
Chr4	1197893	1199505	1613	Chr5	933338	934940	1603	89.93	1
Chr4	1204368	1206925	2558	Chr2	3357052	3359602	2551	97.46	1
Chr4	1210517	1213456	2940	Chr5	672064	675001	2938	83.26	1
Chr4	1239133	1240524	1392	Chr5	649141	650535	1395	91.83	-1
Chr4	1276781	1283408	6628	Chr5	661826	668454	6629	99.56	-1
Chr4	1283498	1284786	1289	Chr5	660448	661736	1289	99.77	-1
Chr4	1285001	1289054	4054	Chr5	656179	660232	4054	99.78	-1
Chr4	1285001	1289054	4054	Chr5	656179	660232	4054	98.89	-1
Chr4	1285001	1289054	4054	Chr5	656179	660232	4054	98.89	-1
Chr4	1290201	1293637	3437	Chr5	651600	655033	3434	99.27	-1
Chr4	1295673	1296730	1058	Chr5	3503781	3504838	1058	100	-1
Chr4	1321113	1323248	2136	Chr6	671129	673283	2155	85.94	1
Chr4	1337994	1339112	1119	Chr4	1470105	1471222	1118	85.27	1
Chr4	1337994	1339112	1119	Chr5	1053890	1055004	1115	84.91	1
Chr4	1359951	1363331	3381	Chr5	562647	566021	3375	98.14	1
Chr4	1369084	1370202	1119	Chr4	946100	947218	1119	99.73	1
Chr4	1369084	1370202	1119	Chr5	571753	572870	1118	99.82	1
Chr4	1371499	1379445	7947	Chr4	948515	956458	7944	99.16	1
Chr4	1371499	1379445	7947	Chr5	574164	582099	7936	99.8	1
Chr4	1371508	1378885	7378	Chr4	1461487	1468788	7302	90.25	-1
Chr4	1371508	1378104	6597	Chr5	1035166	1041699	6534	91.92	1
Chr4	1372877	1378953	6077	Chr4	1109427	1115461	6035	93.13	1
Chr4	1372877	1379444	6568	Chr5	719823	726345	6523	91.47	1
Chr4	1385499	1388114	2616	Chr4	962472	965088	2617	99.96	1
Chr4	1385499	1388114	2616	Chr5	588137	590749	2613	99.81	1
Chr4	1385500	1388114	2615	Chr5	988404	991018	2615	99.77	1
Chr4	1385518	1388096	2579	Chr4	1183882	1186523	2642	86.93	1
Chr4	1385518	1388097	2580	Chr4	1449769	1452382	2614	86.17	-1
Chr4	1385518	1388097	2580	Chr5	734692	737305	2614	86.2	1
Chr4	1386701	1388132	1432	Chr5	1033546	1035025	1480	87.26	-1
Chr4	1393877	1395356	1480	Chr4	3363130	3364652	1523	92.12	-1
Chr4	1393877	1395558	1682	Chr5	788266	789947	1682	99.82	-1
Chr4	1395573	1396661	1089	Chr5	783128	784222	1095	99.18	-1
Chr4	1402795	1410725	7931	Chr5	769056	776989	7934	99.05	-1
Chr4	1415130	1419728	4599	Chr4	995438	1000060	4623	98.36	-1
Chr4	1415265	1416703	1439	Chr5	958230	959683	1454	84.59	1
Chr4	1449695	1452461	2767	Chr4	1183803	1186598	2796	93.99	-1
Chr4	1449695	1452461	2767	Chr5	734613	737379	2767	99.96	-1
Chr4	1449749	1451199	1451	Chr5	1033561	1035025	1465	92.16	1
Chr4	1449769	1452382	2614	Chr4	962491	965071	2581	86.2	-1
Chr4	1449769	1452382	2614	Chr4	1385518	1388097	2580	86.17	-1
Chr4	1449769	1452382	2614	Chr5	588156	590732	2577	86.01	-1
Chr4	1449769	1452382	2614	Chr5	988422	991001	2580	86.08	-1
Chr4	1460933	1462187	1255	Chr5	1041794	1043060	1267	91.17	-1
Chr4	1461249	1467434	6186	Chr5	719824	726037	6214	93.28	-1
Chr4	1461485	1467434	5950	Chr4	1109428	1115394	5967	95.76	-1
Chr4	1461487	1468788	7302	Chr4	948524	955898	7375	89.73	-1
Chr4	1461487	1468788	7302	Chr4	1371508	1378885	7378	90.25	-1
Chr4	1461487	1468788	7302	Chr5	574173	581539	7367	90.36	-1
Chr4	1462285	1468788	6504	Chr5	1035166	1041696	6531	98.64	-1
Chr4	1470100	1471222	1123	Chr5	1053885	1055004	1120	99.47	1
Chr4	1470105	1471222	1118	Chr4	1337994	1339112	1119	85.27	1
Chr4	3363130	3364652	1523	Chr4	1393877	1395356	1480	92.12	-1
Chr4	3363130	3365722	2593	Chr5	788468	791017	2550	94.76	1
Chr5	562252	563324	1073	Chr4	938109	939241	1133	88.2	1
Chr5	562647	566021	3375	Chr4	1359951	1363331	3381	98.14	1
Chr5	571753	572870	1118	Chr4	946100	947218	1119	99.73	1
Chr5	571753	572870	1118	Chr4	1369084	1370202	1119	99.82	1
Chr5	574164	582099	7936	Chr4	948515	956458	7944	99.03	1
Chr5	574164	582099	7936	Chr4	1371499	1379445	7947	99.8	1
Chr5	574173	581539	7367	Chr4	1461487	1468788	7302	90.36	-1
Chr5	574173	580758	6586	Chr5	1035166	1041699	6534	92.04	1
Chr5	575540	581607	6068	Chr4	1109427	1115461	6035	93.25	1
Chr5	575540	582098	6559	Chr5	719823	726345	6523	91.58	1
Chr5	588137	590749	2613	Chr4	962472	965088	2617	99.81	1
Chr5	588137	590749	2613	Chr4	1385499	1388114	2616	99.81	1
Chr5	588138	590749	2612	Chr5	988404	991018	2615	99.62	1
Chr5	588156	590731	2576	Chr4	1183882	1186523	2642	86.78	1
Chr5	588156	590732	2577	Chr4	1449769	1452382	2614	86.01	-1
Chr5	588156	590732	2577	Chr5	734692	737305	2614	86.05	1
Chr5	589335	590748	1414	Chr5	1033565	1035025	1461	87.17	-1
Chr5	599924	601167	1244	Chr4	974156	975399	1244	100	1
Chr5	649141	650535	1395	Chr4	1239133	1240524	1392	91.83	-1
Chr5	651600	655033	3434	Chr4	1290201	1293637	3437	99.27	-1
Chr5	656179	660232	4054	Chr4	1285001	1289054	4054	98.89	-1
Chr5	656179	660232	4054	Chr4	1285001	1289054	4054	98.89	-1
Chr5	656179	660232	4054	Chr4	1285001	1289054	4054	99.78	-1
Chr5	660448	661736	1289	Chr4	1283498	1284786	1289	99.77	-1
Chr5	661826	668454	6629	Chr4	1276781	1283408	6628	99.56	-1
Chr5	672064	675001	2938	Chr4	1210517	1213456	2940	83.26	1
Chr5	711890	713783	1894	Chr2	2740117	2742007	1891	85.81	1
Chr5	719784	725854	6071	Chr4	1109388	1115461	6074	97.81	1
Chr5	719823	726345	6523	Chr4	949892	956457	6566	90.87	1
Chr5	719823	726345	6523	Chr4	1372877	1379444	6568	91.47	1
Chr5	719823	726345	6523	Chr5	575540	582098	6559	91.58	1
Chr5	719824	726037	6214	Chr4	1461249	1467434	6186	93.26	-1
Chr5	719824	725004	5181	Chr5	1036528	1041699	5172	96.06	1
Chr5	734613	737379	2767	Chr4	1183803	1186598	2796	93.96	1
Chr5	734613	737379	2767	Chr4	1449695	1452461	2767	99.96	-1
Chr5	734692	737305	2614	Chr4	962491	965071	2581	86.24	1
Chr5	734692	737305	2614	Chr4	1385518	1388097	2580	86.2	1
Chr5	734692	737305	2614	Chr5	588156	590732	2577	86.05	1
Chr5	734692	737305	2614	Chr5	988422	991001	2580	86.12	1
Chr5	735875	737325	1451	Chr5	1033561	1035025	1465	92.16	-1
Chr5	769056	776989	7934	Chr4	1402795	1410725	7931	99.05	-1
Chr5	783128	784222	1095	Chr4	1395573	1396661	1089	99.18	-1
Chr5	788266	789947	1682	Chr4	1393877	1395558	1682	99.82	-1
Chr5	788468	791017	2550	Chr4	3363130	3365722	2593	94.76	1
Chr5	805719	807158	1440	Chr5	805719	807132	1414	97.99	1
Chr5	805719	807132	1414	Chr5	805719	807158	1440	98.12	1
Chr5	805723	807043	1321	Chr5	947906	949239	1334	87.59	-1
Chr5	805733	807176	1444	Chr4	1041582	1043024	1443	87.08	1
Chr5	896583	897831	1249	Chr5	896679	897927	1249	82.91	1
Chr5	896583	898352	1770	Chr5	896967	898736	1770	83.51	1
Chr5	896585	897795	1211	Chr5	897737	898947	1211	84.17	1
Chr5	896585	897603	1019	Chr5	897929	898947	1019	87.76	1
Chr5	896679	897927	1249	Chr5	896583	897831	1249	82.91	1
Chr5	896762	897891	1130	Chr5	897817	898947	1131	82.98	1
Chr5	896883	898371	1489	Chr5	897459	898947	1489	83.33	1
Chr5	896967	898736	1770	Chr5	896583	898352	1770	83.51	1
Chr5	896969	898446	1478	Chr5	897161	898638	1478	85.49	1
Chr5	897161	898638	1478	Chr5	896969	898446	1478	85.49	1
Chr5	897724	898934	1211	Chr5	896956	898166	1211	83.14	1
Chr5	897737	898947	1211	Chr5	896585	897795	1211	84.17	1
Chr5	897929	898947	1019	Chr5	896585	897603	1019	87.76	1
Chr5	933334	934940	1607	Chr2	2972481	2974095	1615	91.13	-1
Chr5	933338	934940	1603	Chr4	1197893	1199505	1613	89.93	1
Chr5	945348	947094	1747	Chr4	1043489	1045279	1791	91.23	-1
Chr5	947903	949381	1479	Chr4	1041438	1042907	1470	94.73	-1
Chr5	947906	949239	1334	Chr5	805723	807043	1321	87.59	-1
Chr5	953557	957915	4359	Chr4	1032932	1037252	4321	85.95	-1
Chr5	958230	959683	1454	Chr4	998463	999925	1463	85.9	-1
Chr5	958230	959683	1454	Chr4	1415265	1416703	1439	84.59	1
Chr5	988404	991018	2615	Chr4	962473	965088	2616	99.81	1
Chr5	988404	991018	2615	Chr4	1385500	1388114	2615	99.77	1
Chr5	988404	991018	2615	Chr5	588138	590749	2612	99.62	1
Chr5	988422	991000	2579	Chr4	1183882	1186523	2642	86.86	1
Chr5	988422	991001	2580	Chr4	1449769	1452382	2614	86.08	-1
Chr5	988422	991001	2580	Chr5	734692	737305	2614	86.12	1
Chr5	989604	991017	1414	Chr5	1033565	1035025	1461	87.1	-1
Chr5	1007814	1012197	4384	Chr6	3063795	3068178	4384	99.68	-1
Chr5	1020267	1021406	1140	Chr3	2014029	2015162	1134	84.56	-1
Chr5	1033546	1035025	1480	Chr4	1386701	1388132	1432	87.26	-1
Chr5	1033561	1035025	1465	Chr4	1185067	1186544	1478	91.02	-1
Chr5	1033561	1035025	1465	Chr4	1449749	1451199	1451	92.16	1
Chr5	1033561	1034752	1192	Chr5	736149	737325	1177	93.29	-1
Chr5	1033565	1035025	1461	Chr4	963674	965087	1414	87.24	-1
Chr5	1033565	1035025	1461	Chr5	589335	590748	1414	87.17	-1
Chr5	1033565	1035025	1461	Chr5	989604	991017	1414	87.1	-1
Chr5	1035166	1041699	6534	Chr4	948524	955118	6595	91.36	1
Chr5	1035166	1041699	6534	Chr4	1371508	1378104	6597	91.92	1
Chr5	1035166	1041696	6531	Chr4	1462285	1468788	6504	98.64	-1
Chr5	1035166	1041699	6534	Chr5	574173	580758	6586	92.04	1
Chr5	1036528	1041699	5172	Chr4	1109428	1114611	5184	98.23	1
Chr5	1036528	1041699	5172	Chr5	719824	725004	5181	96.06	1
Chr5	1041794	1043060	1267	Chr4	1460933	1462187	1255	91.17	-1
Chr5	1053885	1055004	1120	Chr4	1470100	1471222	1123	99.47	1
Chr5	1053890	1055004	1115	Chr4	1337994	1339112	1119	84.91	1
Chr5	1568674	1573283	4610	Chr5	1568728	1573283	4556	98.07	1
Chr5	1568728	1573283	4556	Chr5	1568674	1573283	4610	98.07	1
Chr5	3423647	3426868	3222	Chr2	3617565	3620789	3225	81.74	-1
Chr5	3437193	3438200	1008	Chr2	3497044	3498055	1012	97.43	-1
Chr5	3439844	3448120	8277	Chr2	3589488	3597787	8300	93.13	1
Chr5	3467987	3469596	1610	Chr2	3501143	3502767	1625	97.72	1
Chr5	3472029	3475337	3309	Chr2	3502767	3506027	3261	94.34	1
Chr5	3475584	3477977	2394	Chr2	3516913	3519307	2395	93.66	1
Chr5	3503781	3504838	1058	Chr4	1295673	1296730	1058	100	-1
Chr5	3530825	3532197	1373	Chr6	1000310	1001668	1359	86.11	-1
Chr5	3555289	3564620	9332	Chr2	3326660	3335983	9324	89.53	1
Chr5	3565284	3569308	4025	Chr2	3336647	3340629	3983	98.68	1
Chr5	3672628	3677432	4805	Chr2	2905310	2910090	4781	97.71	-1
Chr5	3672628	3677432	4805	Chr2	3224827	3229607	4781	97.71	-1
Chr5	3672628	3677432	4805	Chr2	3414473	3419249	4777	97.9	1
Chr5	3691269	3692344	1076	Chr2	3205339	3206414	1076	99.63	-1
Chr5	3692528	3695399	2872	Chr2	3202286	3205155	2870	99.83	-1
Chr6	671129	673283	2155	Chr4	1321113	1323248	2136	85.94	1
Chr6	1000310	1001668	1359	Chr5	3530825	3532197	1373	86.11	-1
Chr6	2568022	2573911	5890	Chr6	2568041	2573911	5871	99.31	1
Chr6	2568041	2573911	5871	Chr6	2568022	2573911	5890	99.31	1
Chr6	3063795	3068178	4384	Chr5	1007814	1012197	4384	99.68	-1
Chr7	231127	232535	1409	Chr2	3460100	3461519	1420	84.04	1
Chr7	232535	234209	1675	Chr2	3461898	3463574	1677	84.53	1
Chr8	1179502	1184290	4789	Chr8	1179502	1184335	4834	98.2	1
Chr8	1179502	1184335	4834	Chr8	1179502	1184290	4789	98.63	1
